# Supplementary material
Source: PubMed Central journal article supplement (PMC3280491)
Supplement: 97320630007360S1.pdf [file 97320630007360S1.pdf]

## Supplementary material:

**Table 1:** Function regions of CYP4V2 predicted using ConSurf server with high amino acid conservation score (9 - conserved, 1 - variable).

| Residue | Conservation score | Buried (B)/Exposed (E) | Residual variety          |
|---------|--------------------|------------------------|---------------------------|
| W130    | 9                  | B                      | W,G                       |
| L131    | 9                  | B                      | M,I,L                     |
| G132    | 9                  | E                      | S,A,N,R,K,G               |
| L133    | 5                  | E                      | A,F,S,T,N,K,E,Q,C,D,R,I,L |
| G134    | 9                  | B                      | S,C,G                     |
| L135    | 9                  | E                      | M,P,I,L                   |
| L136    | 8                  | B                      | F,M,I,L,V                 |
| T137    | 8                  | E                      | T,N,R,I,L,V               |
| S138    | 9                  | E                      | F,A,S,T,N,C,D,G,L         |
| L150    | 8                  | B                      | A,F,M,I,L                 |
| T151    | 9                  | E                      | A,W,T,D,N,I,G             |
| P152    | 9                  | E                      | S,Q,M,P                   |
| T153    | 8                  | E                      | S,A,T,C                   |
| F154    | 9                  | B                      | F,L                       |
| H155    | 9                  | B                      | H,N,P                     |
| F156    | 9                  | B                      | H,S,F,L,Y                 |
| R320    | 9                  | E                      | Q,C,I,K,R,L               |
| E321    | 9                  | E                      | A,Q,N,D,K,E               |
| E322    | 9                  | E                      | Q,E,V                     |
| V323    | 9                  | B                      | I,V                       |
| D324    | 9                  | E                      | H,N,D,E                   |
| T325    | 9                  | B                      | T,I,LF                    |
| F326    | 9                  | B                      | F,I,V                     |
| M327    | 9                  | B                      | T,M,I,L,V                 |
| F328    | 9                  | B                      | F,I,L                     |
| E329    | 8                  | E                      | A,R,G,E                   |
| G330    | 9                  | B                      | A,G,BV                    |
| H331    | 9                  | E                      | H,Q,N                     |
| D332    | 9                  | E                      | D,E                       |
| T333    | 9                  | E                      | S,T                       |
| F398    | 5                  | B                      | F,T,Y,V,H,Q,M,I,L         |
| I506    | 8                  | B                      | T,I,L,V                   |
| L507    | 8                  | B                      | T,N,V,H,M,I,R,L           |
| R508    | 8                  | E                      | S,M,T,I,K,R,L             |

**Table 2:** Ligand properties

| Ligand        | Molar weight | LogP | H acceptor | H donor | pKa   | pKb  | psa   | logD | logK   | Total charge |
|---------------|--------------|------|------------|---------|-------|------|-------|------|--------|--------------|
| Caprylic acid | 143.204      | 2.44 | 2          | 1       | 5.19  | 0    | 37.30 | 0.63 | 1.417  | 0.001        |
| Lauric acid   | 200.318      | 3.21 | 2          | 2       | 11.88 | 4.03 | 40.46 | 3.21 | -5.2   | 0.002        |
| Myristic acid | 227.363      | 4.82 | 2          | 1       | 4.95  | 0    | 37.30 | 2.78 | -8.031 | 0.001        |
| Palmitic acid | 255.416      | 5.61 | 2          | 1       | 4.95  | 0    | 37.30 | 3.57 | -13.55 | 0.001        |

**Table 3:** Docking analysis of CYP4V2 with selected ligands

| Ligand        | Free Energy of Binding (kcal/mol) | Inhibition Constant, Ki (uM) | vdW + Hbond + desolv Energy (kcal/mol) | Electrostatic Energy (kcal/mol) | Total Intermolec. Energy (kcal/mol) | Interact. Surface |
|---------------|-----------------------------------|------------------------------|----------------------------------------|---------------------------------|-------------------------------------|-------------------|
| Caprylic acid | -4.30                             | 707.14                       | -5.85                                  | -0.05                           | -5.89                               | 353.002           |
| Lauric acid   | -5.99                             | 40.85                        | -7.64                                  | -0.05                           | -7.69                               | 427.342           |
| Myristic acid | -5.72                             | 64.20                        | -8.70                                  | 0.07                            | -8.63                               | 480.982           |
| Palmitic acid | -6.14                             | 31.58                        | -9.60                                  | -0.03                           | -9.63                               | 534.563           |

**Table 4:** Details of intermolecular interactions in the binding site of CYP4V2 with ligands

| Ligand complex | Hydrophobic*                                                                                                                                                                                                                                                        | Polar                | Cation          | Other                                                                                                                                                                                                          |
|----------------|---------------------------------------------------------------------------------------------------------------------------------------------------------------------------------------------------------------------------------------------------------------------|----------------------|-----------------|----------------------------------------------------------------------------------------------------------------------------------------------------------------------------------------------------------------|
| Caprylic acid  | C2-LEU136 (3.25),<br>C1-LEU136 (3.13),<br>C7-PHE328 (3.62),<br>C6-PHE398 (3.76)                                                                                                                                                                                     | O2 -SER394<br>(3.38) | -               | C1-GLU329(3.51),<br>C3-GLU329(3.58),<br>C3-THR333(3.63)<br>C5-THR333(3.38)<br>C7-THR333(3.33)<br>C8-SER394(3.89)<br>O1-SER394 (3.61)<br>O2-SER394(3.48)<br>O2-PHE398(3.43)                                     |
| Lauric acid    | C10-LEU136 (3.87)<br>C11-ILE230 (3.51)<br>C11-PHE231(3.87)<br>C5-PHE328(3.68)<br>C7-PHE328(3.84)<br>C9-PHE328(3.48)<br>C11-PHE328(3.77)<br>C6-PHE398(3.59)<br>C8-PHE398(3.82)<br>C7-ILE506(3.69)<br>C9-ILE506(3.89)<br>C11-ILE506(3.50)                             | -                    | H1-PHE328(3.35) | O1-LEU136(3.52)<br>C9-SER227(3.36)<br>C11-SER227(3.78)<br>H1-GLU329(3.67)<br>O2-GLU329(3.53)<br>H2-GLU329(3.53)<br>C7-ASP332(3.86)<br>C9-ASP332(3.10)<br>O2-THR333(3.31)<br>H2-THR333(3.36)<br>C4-SER394(3.76) |
| Myristic Acid  | C6-LEU136(3.53)<br>C13-ILE230(3.84)<br>C10-PHE328<br>C12-PHE329(3.71)<br>C14-PHE328(3.62)<br>C2-PHE398(3.78)<br>C1-PHW398(3.65)<br>C3-PHE398(3.69)<br>C9-PHE398(3.51)<br>C11-LEU505(3.40)<br>C13-LEU505(3.71)<br>C7-ILE506(3.76)<br>C14-ILE506(3.90)                | O2-ASP332(3.14)      | -               | O1-PHE328(3.42)<br>C14-ASP332(3.90)<br>C8-THR333(3.64)<br>C10-THR333(3.87)<br>O2-THR333(3.71)<br>C3-SER394(3.32)<br>C5-SER394(3.26)<br>O2-ILE506(3.80)<br>O1-ILE506(3.77)                                      |
| Palmitic acid  | C2-LEU136 (3.11)<br>C1-LEU136 (3.61)<br>C4-LEU136 (3.64)<br>C12-ILE230 (3.80)<br>C15-PRO393 (3.37)<br>C5-PHE398 (3.45)<br>C2-PHE398 (3.20)<br>C4-PHE398 (3.76)<br>C6-PHE398 (3.30)<br>C8-PHE398 (3.88)<br>C10-PHE398 (3.14)<br>C12-LEU505(3.14)<br>C14-LEU505(3.17) | -                    | -               | C11-THR333(3.33)<br>C13-THR333(3.84)<br>C15-THR(3.63)<br>C7-SER394(3.36)<br>C9-SER394(3.32)<br>C13-SER394(3.32)<br>C15-SER394(3.58)<br>O2-PHE398(3.84)                                                         |

\*C(X) -R(X) (D):

C(X) - atom name, R(X) - residue name, number within 4 Angstrom from the given ligand atom, (D) - lowest inter atomic distance between the given ligand atom and the residue. For example: C2-LEU136 (3.11), here C2 is C(X), LEU136 is R(X) and 3.11 is (D)
